# Supplementary material for: Self-Assembled Micelles Composed of Doxorubicin Conjugated Y-Shaped PEG-Poly(glutamic acid)2 Copolymers via Hydrazone Linkers
Source: PubMed Central journal article supplement (PMC6271086; doi:10.3390/molecules190811915), 2014-08-11

## Supplementary File

### Self-Assembled Micelles Composed of Doxorubicin Conjugated Y-Shaped PEG-Poly (glutamic acid)<sub>2</sub> Copolymers via Hydrazone Linker

**Figure S1.** <sup>1</sup>H-NMR spectra of PEG<sub>5k</sub>-PBLG<sub>5.7k</sub> (a); PEG<sub>5k</sub>-PBLG<sub>13.6k</sub> (b); PEG<sub>5k</sub>-(PBLG<sub>5.7k</sub>)<sub>2</sub> (c) and PEG<sub>5k</sub>-(PBLG<sub>6.8k</sub>)<sub>2</sub> (d) copolymer in CDCl<sub>3</sub>.

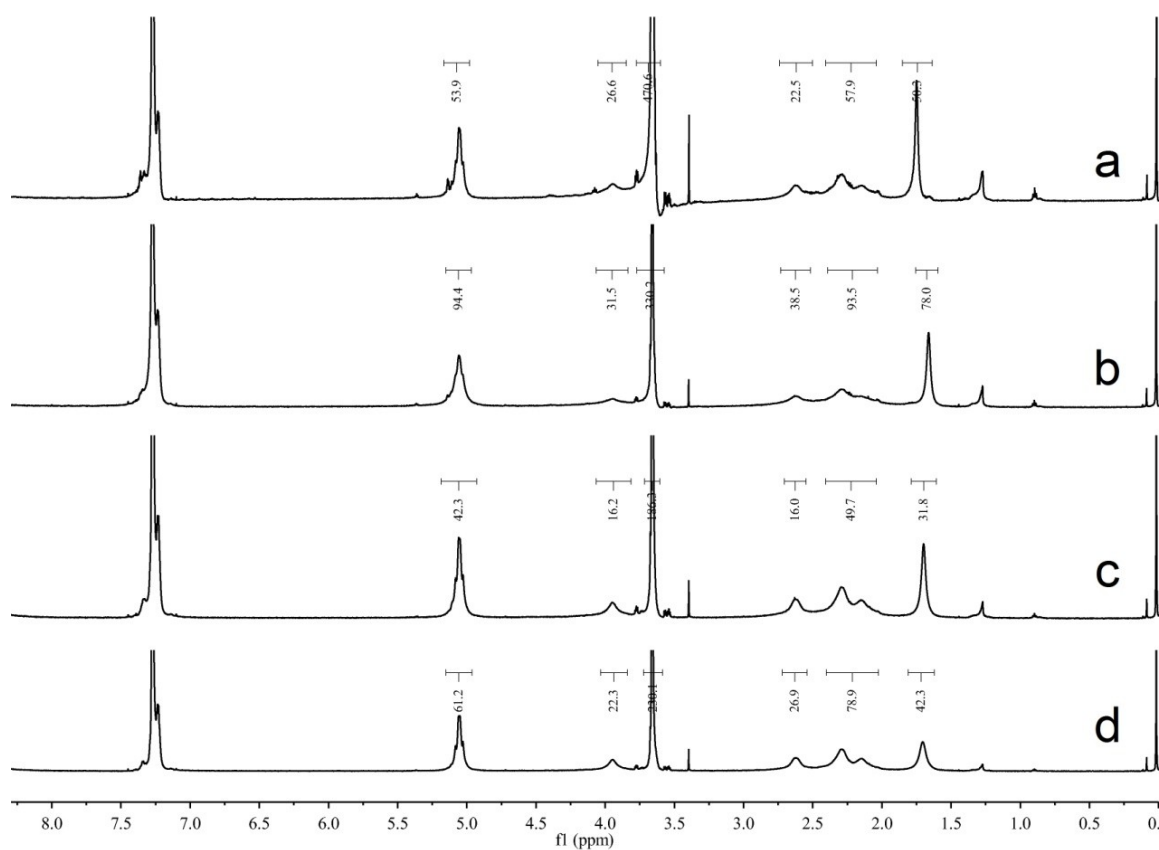

**Figure S2.**  $^1\text{H}$ -NMR spectra of PEG-p(Glu<sub>26</sub>-Hyd) (a), PEG-p(Glu<sub>62</sub>-Hyd) (b), PEG-p(Glu<sub>26</sub>-Hyd)<sub>2</sub> (c) and PEG-p(Glu<sub>31</sub>-Hyd)<sub>2</sub> (d) polymer in CF<sub>3</sub>COOD/DMSO-d<sub>6</sub>.

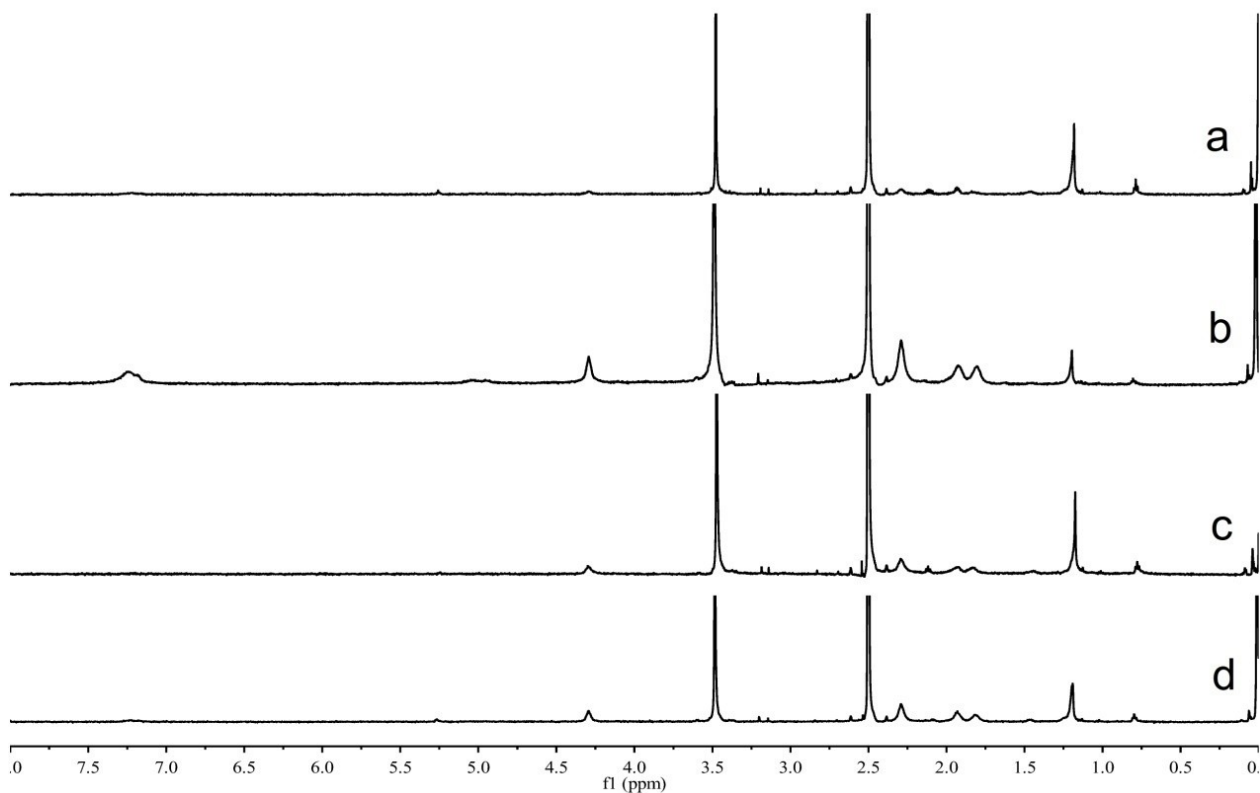

**Figure S3.** DMF gel permeation chromatography traces of PEG-NH<sub>2</sub> (a); PEG-S-(CH<sub>2</sub>CH<sub>2</sub>NH<sub>2</sub>)<sub>2</sub> (b); PEG<sub>5k</sub>-PBLG<sub>5.7k</sub> (c); PEG<sub>5k</sub>-(PBLG<sub>5.7k</sub>)<sub>2</sub> (d); PEG<sub>5k</sub>-PBLG<sub>13.6k</sub> (e) and PEG<sub>5k</sub>-(PBLG<sub>6.8k</sub>)<sub>2</sub> (f) copolymers.

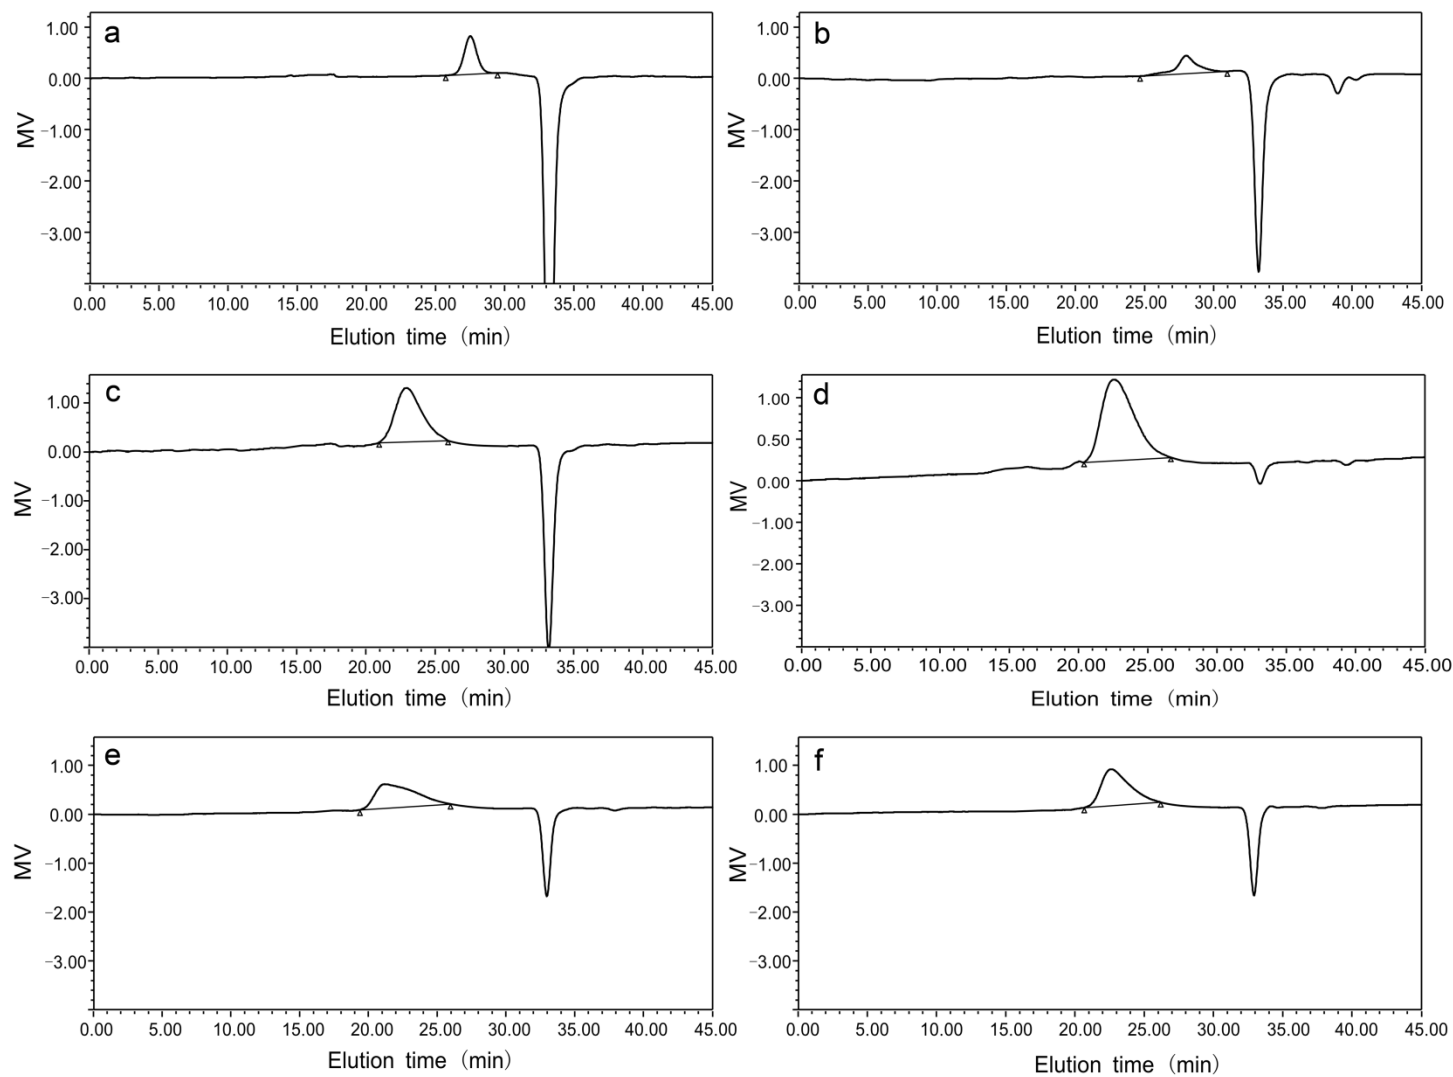

Supplement: molecules-19-11915-s001.pdf [file molecules-19-11915-s001.pdf]
